# Supplementary material for: The citation advantage of linking publications to research data
Source: PubMed Central journal article supplement (PMC7176083; doi:10.1371/journal.pone.0230416), 2020-04-22

# PLOS ONE

## The citation advantage of linking publications to research data

--Manuscript Draft--

|                                                                                                                                                                                                                                                                                                                                                                                                                                                                         |                                                                                                                                                                                                                                                                                                                                                                                                                                                                                                                                                                                                                                                                                                                                                                                                                                                                                                                                                                                                                                                                                                                                                                                                                                                                                                                                                                             |
|-------------------------------------------------------------------------------------------------------------------------------------------------------------------------------------------------------------------------------------------------------------------------------------------------------------------------------------------------------------------------------------------------------------------------------------------------------------------------|-----------------------------------------------------------------------------------------------------------------------------------------------------------------------------------------------------------------------------------------------------------------------------------------------------------------------------------------------------------------------------------------------------------------------------------------------------------------------------------------------------------------------------------------------------------------------------------------------------------------------------------------------------------------------------------------------------------------------------------------------------------------------------------------------------------------------------------------------------------------------------------------------------------------------------------------------------------------------------------------------------------------------------------------------------------------------------------------------------------------------------------------------------------------------------------------------------------------------------------------------------------------------------------------------------------------------------------------------------------------------------|
| <b>Manuscript Number:</b>                                                                                                                                                                                                                                                                                                                                                                                                                                               | PONE-D-19-18900                                                                                                                                                                                                                                                                                                                                                                                                                                                                                                                                                                                                                                                                                                                                                                                                                                                                                                                                                                                                                                                                                                                                                                                                                                                                                                                                                             |
| <b>Article Type:</b>                                                                                                                                                                                                                                                                                                                                                                                                                                                    | Research Article                                                                                                                                                                                                                                                                                                                                                                                                                                                                                                                                                                                                                                                                                                                                                                                                                                                                                                                                                                                                                                                                                                                                                                                                                                                                                                                                                            |
| <b>Full Title:</b>                                                                                                                                                                                                                                                                                                                                                                                                                                                      | The citation advantage of linking publications to research data                                                                                                                                                                                                                                                                                                                                                                                                                                                                                                                                                                                                                                                                                                                                                                                                                                                                                                                                                                                                                                                                                                                                                                                                                                                                                                             |
| <b>Short Title:</b>                                                                                                                                                                                                                                                                                                                                                                                                                                                     | The citation advantage of linking publications to research data                                                                                                                                                                                                                                                                                                                                                                                                                                                                                                                                                                                                                                                                                                                                                                                                                                                                                                                                                                                                                                                                                                                                                                                                                                                                                                             |
| <b>Corresponding Author:</b>                                                                                                                                                                                                                                                                                                                                                                                                                                            | Giovanni Colavizza<br>Universiteit van Amsterdam<br>NETHERLANDS                                                                                                                                                                                                                                                                                                                                                                                                                                                                                                                                                                                                                                                                                                                                                                                                                                                                                                                                                                                                                                                                                                                                                                                                                                                                                                             |
| <b>Keywords:</b>                                                                                                                                                                                                                                                                                                                                                                                                                                                        | data availability statement; citation advantage; open science; reproducibility                                                                                                                                                                                                                                                                                                                                                                                                                                                                                                                                                                                                                                                                                                                                                                                                                                                                                                                                                                                                                                                                                                                                                                                                                                                                                              |
| <b>Abstract:</b>                                                                                                                                                                                                                                                                                                                                                                                                                                                        | <p>Efforts to make research results open and reproducible are increasingly reflected by journal policies encouraging or mandating authors to provide data availability statements.</p> <p>As a consequence of this, there has been a strong uptake of data availability statements in recent literature.</p> <p>Nevertheless, it is still unclear what proportion of these statements actually contain well-formed links to data, for example via a URL or permanent identifier, and if there is an added value in providing them.</p> <p>We consider 531,889 journal articles published by PLOS and BMC which are part of the PubMed Open Access collection, categorize their data availability statements according to their content and analyze the citation advantage of different statement categories via regression.</p> <p>We find that, following mandated publisher policies, data availability statements have become common by now, yet statements containing a link to a repository are still just a fraction of the total.</p> <p>We also find that articles with these statements, in particular, can have up to 25.36% higher citation impact on average: an encouraging result for all publishers and authors who make the effort of sharing their data.</p> <p>All our data and code are made available in order to reproduce and extend our results.</p> |
| <b>Order of Authors:</b>                                                                                                                                                                                                                                                                                                                                                                                                                                                | Giovanni Colavizza<br>Iain Hrynaszkiewicz<br>Isla Staden<br>Kirstie Whitaker<br>Barbara McGillivray                                                                                                                                                                                                                                                                                                                                                                                                                                                                                                                                                                                                                                                                                                                                                                                                                                                                                                                                                                                                                                                                                                                                                                                                                                                                         |
| <b>Additional Information:</b>                                                                                                                                                                                                                                                                                                                                                                                                                                          |                                                                                                                                                                                                                                                                                                                                                                                                                                                                                                                                                                                                                                                                                                                                                                                                                                                                                                                                                                                                                                                                                                                                                                                                                                                                                                                                                                             |
| <b>Question</b>                                                                                                                                                                                                                                                                                                                                                                                                                                                         | <b>Response</b>                                                                                                                                                                                                                                                                                                                                                                                                                                                                                                                                                                                                                                                                                                                                                                                                                                                                                                                                                                                                                                                                                                                                                                                                                                                                                                                                                             |
| <b>Financial Disclosure</b><br><br>Enter a financial disclosure statement that describes the sources of funding for the work included in this submission. Review the <a href="#">submission guidelines</a> for detailed requirements. View published research articles from <a href="#">PLOS ONE</a> for specific examples.<br><br>This statement is required for submission and <b>will appear in the published article</b> if the submission is accepted. Please make | <p>This work was supported by The Alan Turing Institute under the EPSRC grant EP/N510129/1 and by Macmillan Education Ltd, part of Springer Nature, through grant RG92108 "Effect of data sharing policies on articles' citation counts" both granted to BMC and IH.</p>                                                                                                                                                                                                                                                                                                                                                                                                                                                                                                                                                                                                                                                                                                                                                                                                                                                                                                                                                                                                                                                                                                    |

sure it is accurate.

#### Unfunded studies

Enter: *The author(s) received no specific funding for this work.*

#### Funded studies

Enter a statement with the following details:

- Initials of the authors who received each award
- Grant numbers awarded to each author
- The full name of each funder
- URL of each funder website
- Did the sponsors or funders play any role in the study design, data collection and analysis, decision to publish, or preparation of the manuscript?
- **NO** - Include this sentence at the end of your statement: *The funders had no role in study design, data collection and analysis, decision to publish, or preparation of the manuscript.*
- **YES** - Specify the role(s) played.

\* typeset

#### Competing Interests

Use the instructions below to enter a competing interest statement for this submission. On behalf of all authors, disclose any [competing interests](#) that could be perceived to bias this work—acknowledging all financial support and any other relevant financial or non-financial competing interests.

This statement **will appear in the published article** if the submission is accepted. Please make sure it is accurate. View published research articles from [PLOS ONE](#) for specific examples.

The authors have declared that no competing interests exist.

**NO authors have competing interests**

Enter: *The authors have declared that no competing interests exist.*

**Authors with competing interests**

Enter competing interest details beginning with this statement:

*I have read the journal's policy and the authors of this manuscript have the following competing interests: [insert competing interests here]*

\* typeset

**Ethics Statement**

N/A

Enter an ethics statement for this submission. This statement is required if the study involved:

- Human participants
- Human specimens or tissue
- Vertebrate animals or cephalopods
- Vertebrate embryos or tissues
- Field research

Write "N/A" if the submission does not require an ethics statement.

General guidance is provided below. Consult the [submission guidelines](#) for detailed instructions. **Make sure that all information entered here is included in the Methods section of the manuscript.**

**Format for specific study types**

**Human Subject Research (involving human participants and/or tissue)**

- Give the name of the institutional review board or ethics committee that approved the study
- Include the approval number and/or a statement indicating approval of this research
- Indicate the form of consent obtained (written/oral) or the reason that consent was not obtained (e.g. the data were analyzed anonymously)

**Animal Research (involving vertebrate animals, embryos or tissues)**

- Provide the name of the Institutional Animal Care and Use Committee (IACUC) or other relevant ethics board that reviewed the study protocol, and indicate whether they approved this research or granted a formal waiver of ethical approval
- Include an approval number if one was obtained
- If the study involved *non-human primates*, add *additional details* about animal welfare and steps taken to ameliorate suffering
- If anesthesia, euthanasia, or any kind of animal sacrifice is part of the study, include briefly which substances and/or methods were applied

**Field Research**

Include the following details if this study involves the collection of plant, animal, or other materials from a natural setting:

- Field permit number
- Name of the institution or relevant body that granted permission

**Data Availability**

Authors are required to make all data underlying the findings described fully available, without restriction, and from the time of publication. PLOS allows rare exceptions to address legal and ethical concerns. See the [PLOS Data Policy](#) and [FAQ](#) for detailed information.

Yes - all data are fully available without restriction

A Data Availability Statement describing where the data can be found is required at submission. Your answers to this question constitute the Data Availability Statement and **will be published in the article**, if accepted.

**Important:** Stating 'data available on request from the author' is not sufficient. If your data are only available upon request, select 'No' for the first question and explain your exceptional situation in the text box.

Do the authors confirm that all data underlying the findings described in their manuscript are fully available without restriction?

**Describe where the data may be found in full sentences. If you are copying our sample text, replace any instances of XXX with the appropriate details.**

- If the data are **held or will be held in a public repository**, include URLs, accession numbers or DOIs. If this information will only be available after acceptance, indicate this by ticking the box below. For example: *All XXX files are available from the XXX database (accession number(s) XXX, XXX).*
- If the data are all contained **within the manuscript and/or Supporting Information files**, enter the following: *All relevant data are within the manuscript and its Supporting Information files.*
- If neither of these applies but you are able to provide **details of access elsewhere**, with or without limitations, please do so. For example:

*Data cannot be shared publicly because of [XXX]. Data are available from the XXX Institutional Data Access / Ethics Committee (contact via XXX) for researchers who meet the criteria for access to confidential data.*

*The data underlying the results presented in the study are available from (include the name of the third party*

Code and data can be found at: <https://doi.org/10.5281/zenodo.3268810>.

*and contact information or URL).*

- This text is appropriate if the data are owned by a third party and authors do not have permission to share the data.

\* typeset

Additional data availability information:

# The citation advantage of linking publications to research data

Giovanni Colavizza<sup>1,2,\*</sup>, Iain Hrynaszkiwicz<sup>3,4</sup>, Isla Staden<sup>1,5</sup>, Kirstie Whitaker<sup>1,6</sup>, Barbara McGillivray<sup>1,6</sup>

**1** The Alan Turing Institute, UK.

**2** University of Amsterdam, NL.

**3** Springer Nature, UK.

**4** Public Library of Science, UK.

**5** Queen Mary University, UK.

**6** University of Cambridge, UK.

\* [g.colavizza@uva.nl](mailto:g.colavizza@uva.nl)

## Abstract

Efforts to make research results open and reproducible are increasingly reflected by journal policies encouraging or mandating authors to provide data availability statements. As a consequence of this, there has been a strong uptake of data availability statements in recent literature. Nevertheless, it is still unclear what proportion of these statements actually contain well-formed links to data, for example a URL or permanent identifier, and if there is an added value in providing them. We consider 531,889 journal articles published by PLOS and BMC ~~which are part of the PubMed Open Access collection~~, categorize their data availability statements according to their content and analyze the citation advantage of different statement categories via regression. We find that, following mandated publisher policies, data availability statements ~~have become common by now~~, yet statements containing a link to a repository are still just a fraction of the total. We also find that articles with these statements, in particular, can have up to 25.36% higher citation impact on average: an encouraging result for all publishers and authors who make the effort of sharing their data. All our data and code are made available in order to reproduce and extend our results.

## Introduction

More research funding agencies, institutions, journals and publishers are introducing policies that encourage or require the sharing of research data that support publications. Research data policies in general are intended to improve the reproducibility and quality of published research, to increase the benefits to society of conducting research by promoting its reuse, and to give researchers more credit for sharing their work [1]. While some journals have required data sharing by researchers (authors) for more than two decades, these requirements have tended to be limited to specific types of research, such as experiments generating protein structural data [2]. It is a more recent development for journals and publishers covering multiple research disciplines to introduce common requirements for sharing research data, and for reporting the availability of data from their research in published articles [3].

Journal research data policies often include requirements for researchers to provide Data Availability Statements (DAS) in published articles, and the policies of some research funding agencies, such as the UK's Engineering and Physical Sciences Research Council (EPSRC), also require that researchers' publications include DAS. A DAS provides a statement about where data supporting the results reported in a published article can be found, whether those data are available publicly in a data repository, available with the published article as supplementary information, available only privately, upon request or not at all. DAS can appear in different styles and with different titles depending on the publisher. They are also known as Data Accessibility Statements, Data Sharing Statements and, in this study, 'Availability of supporting data' and 'Availability of data and materials' statements. Many journals from multiple publishers mandate the inclusion of DAS in published articles, and this is increasing as more large publishers have begun to standardize and harmonize their journal research data policies [4], since 2016 in particular [5]. Consensus also grows at funding agencies of DAS utility as a means to establish and assess compliance with data policies [6].

Research data policies of funding agencies and journals can influence researchers' willingness to share research data [7, 8], and strong journal data sharing policies have associated with increased availability of research data [9]. However, surveys of researchers have also shown that researchers feel they should receive more credit for sharing data [10]. Citations (referencing) in scholarly publications provide evidence for claims and citation counts also remain an important measure of the impact and reuse of research and a means for researchers to receive credit for their work.

Several studies explored compliance with journal data sharing policies [11–15]. For example, DAS in PLOS have been found to be significantly on the rise, after a mandated policy has been introduced, even if providing data in a repository remains a sharing method used only in a fraction of articles [16]. This is a known problem more generally: DAS contain links to data (and software) repositories only too rarely [17–19]. Nevertheless there are benefits to data sharing [20–22]. It is known that, for example, the biomedical literature in PubMed has shown clear signs of improvement in the transparency and reproducibility of results over recent years, including sharing data [23]. Some previous studies have shown that in specific research disciplines – such as gene expression studies [24, 25], paleoceanography [26], astronomy [27] and astrophysics [28] – sharing research data that support scholarly publications, or linking research data to publications, are associated with increased citations to papers. However, to our knowledge, no previous study has sought to determine if providing a DAS, and specifically providing links to supporting data files in a DAS, has an effect on citations across multiple journals, publishers and a wide variety of research disciplines. Making data (and code) available increases the time (and presumably cost) taken to publish papers [29], which has implications for authors, editors and publishers. As more journals and funding agencies require the provision of DAS, further evidence of the benefits of providing them, for example as measured through citations, is needed – for funding agencies, publishers, institutions, and researchers.

In this study, we consider DAS in journal articles published by two publishers: BMC and PLOS. We focus on the PubMed Open Access collection, and assess to what extent authors are complying with DAS policies. We further study the contents of DAS, by considering three categories: data available upon request, data available in the paper or supplementary materials, and data made available via a direct link to it. We assume this last category to be ideal with respect to openness and reproducibility, and further assess if there is a citation advantage for an article belonging to any of these categories. This contribution is organized as follows: we first discuss materials and methods, which are all made available, we then discuss the presence of DAS in the dataset under consideration and the results of citation prediction. We conclude with a discussion and



future perspectives.

## Materials and methods

### Data

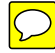

~~To make this study completely reproducible, we focus only on open access publications and release all the accompanying code (see Data and Code Availability Section). We use the PubMed Open Access (OA) collection, up to all publications from 2018 included.~~<sup>1</sup> We consider both commercial and non-commercial publications and work from the xml export. Publications without a known identifier (DOI, PubMed ID, PMC ID or a publisher-specific ID), a publication date and at least one reference are discarded. The final publication count totals  $N = 1,969,175$ .

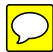

Our analyses focus on a subset of these publications, specifically from two publishers: PLOS (Public Library of Science) and BMC (BioMed Central). PLOS and BMC were selected for this study as they were among the first publishers to introduce DAS. ~~Further, all papers published in the BMC and PLOS journals are open access and available under licenses that enable articles to be reused, and are both well represented in the PubMed OA collection.~~ Identifying PLOS journals is straightforward, as they are all named starting with ‘PLOS’, e.g. ‘PLOS ONE’. We identify BMC journals using an expert-curated list (see footnote 3 below). We further remove review articles and editorials from this dataset, and are left with a final publication count totalling  $M = 531,889$  journal articles. Our full data extraction and processing pipeline is illustrated in Figure 1.<sup>2</sup>

**Fig 1. Data extraction and processing steps.** We first downloaded the PubMed open access collection (1) and created a database with all articles with a known identifier and which contained at least one reference (2;  $N = 1,969,175$ ). Next we identified and disambiguated authors of these papers (3;  $S = 4,253,172$ ) and calculated citations for each author and each publication from within the collection (4). We used these citation counts to calculate a within-collection H-index for each author. Our analysis only focuses on PLOS and BMC publications as these publishers introduced mandated DAS, so we filtered the database for these articles and extracted DAS from each publication (5). We annotated a training dataset by labelling each of these statements into one of four categories (6) and used those labels to train a natural language processing classifier (7). Using this classifier we then categorised the remaining DAS in the database (8). Finally, we exported this categorised dataset of  $M = 531,889$  publications to a csv file (9) and archived it (see Data and code availability section below).

### Data availability statements: policies and extraction

On 1 March 2014, PLOS introduced a mandate which *required* DAS to be included with all publications and required all authors to share the research data supporting their publications [39]. In 2011 BMC journals began to introduce a policy that either *required* or *encouraged* authors to include an equivalent section in their publications,

<sup>1</sup> <https://www.ncbi.nlm.nih.gov/pmc/tools/openftlist>. Downloaded using the FTP service in February 2019.

<sup>2</sup> The processing pipeline, including DAS classification, as well as the descriptive part below were all developed in Python [30], mainly relying on the following libraries or tools: `scipy` [31], `scikit-learn` [32], `pandas` [33], `numpy` [34], `nltk` [35], `matplotlib` [36], `seaborn` [37], `gensim` [38], `beautifulsoup` (<https://www.crummy.com/software/BeautifulSoup>), `TextBlob` (<https://github.com/sloria/textblob>) and `pymongo` (MongoDB, <https://www.mongodb.com>).

‘Availability of supporting data’ [40], the number of BMC journals that adopted one of these policies increased between 2011 and 2015. In 2015 BMC updated and standardised its policy and all of its journals (more than 250 journals) required – mandated – a DAS (styled as ‘Availability of data and materials’) in all its publications. This provides sufficient time for publications in these journals to accrue citations for the analysis. Further, all papers published in the BMC and PLOS journals are open access and available under licenses that enable the content and metadata of the articles to be text-mined and analysed for research purposes. We encoded the dates in which these policies were introduced by the different BMC journals, and the type of policy (that is, DAS encouraged or DAS required/mandated) in the list of journals – which also include PLOS journals.<sup>3</sup>

The extraction of DAS from the xml files is straightforward for PLOS journals, while it requires closer inspection for BMC journals. We established a set of rules to detect and extract statements from both sets of journals, as documented in our repository.<sup>4</sup> A total of  $M_d = 184,075$  (34.6%) publications have a DAS in our dataset. We focus this study on DAS provided in the standard sections of articles according to the publisher styles of PLOS and BMC. While this choice does not consider unstructured statements in publications that might describe the availability of supporting data elsewhere, such as sentences in Methods or Results sections of articles, our analysis intentionally focuses on articles in journals with editorial policies that include the use of a DAS.

### Data availability statements: classification

The content of DAS can take different forms, which reflect varying levels of data availability, different community and disciplinary cultures of data sharing, specific journal style recommendations, and authors’ choices. Some statements contain standard text typically provided by publishers, e.g. ‘The authors confirm that all data underlying the findings are fully available without restriction. All relevant data are within the paper and its Supporting Information files.’ In other cases, the authors may have decided to modify the standard text to add further details about the location of the data for their study, providing a DOI or a link to a specific repository. Where research data are not publicly available, authors may justify this with additional information or provide information on how readers can request access to the data. In other cases, the authors may declare that the data are not available, or that a DAS is not applicable in their case.

We identified four categories of DAS, further described in Table 1. We use fewer categories than [16], ~~mainly due to the sparsity of most of them~~, which would impede reliable classification results. Our four categories cover the most well-represented categories from this study, namely: not available or ‘access restricted’ (our category 0); ‘upon request’ (our category 1); ‘in paper’ or ‘in paper and SI’ or ‘in SI’ (our category 2); ‘repository’ (our category 3). We consider category 3 to be the most desirable one, because the data (or code) are shared as part of a publication and the authors provide a direct link to a repository (e.g. via a unique URL, or, preferably, a persistent identifier). We manually categorized 380 statements according to this coding approach, including all statements repeated eight or more times in the dataset (some DAS are very frequent, resulting from default statements left unchanged by authors) and a random selection from the rest. We used a randomly selected set of 304 (80%) of those statements to train different classifiers and the remaining 76 statements to test the classifiers’

<sup>3</sup>See [https://github.com/alan-turing-institute/das-public/blob/master/dataset/config/journal\\_list.csv](https://github.com/alan-turing-institute/das-public/blob/master/dataset/config/journal_list.csv).

<sup>4</sup> During the course of our study Europe PMC improved its tagging and classification of DAS, in their various styles, which we did not use in our study: <http://blog.europepmc.org/2018/11/mapping-out-path-to-data.html>.

**Table 1. Categories of DAS identified in our coding approach.**

| Category | Definition                                                | Example                                                                                                                                                                                                                                             |
|----------|-----------------------------------------------------------|-----------------------------------------------------------------------------------------------------------------------------------------------------------------------------------------------------------------------------------------------------|
| 0        | Not available                                             | <i>No additional data available (common).</i>                                                                                                                                                                                                       |
| 1        | Data available on request or similar                      | <i>Supporting information is available in the additional files and further supporting data is available from the authors on request (DOI: 10.1186/1471-2164-14-876).</i>                                                                            |
| 2        | Data available with the paper and its supplementary files | <i>The authors confirm that all data underlying the findings are fully available without restriction. All data are included within the manuscript (DOI: 10.1371/journal.pone.0098191).</i>                                                          |
| 3        | Data available in a repository                            | <i>The authors confirm that all data underlying the findings are fully available without restriction. The transcriptome data is deposited at NCBI/Gene Bank as the TSA accession SRR1151079 and SRR1151080 (DOI: 10.1371/journal.pone.0106370).</i> |

accuracy. The sifiers we trained are listed below:

- NB-BOW: Multinomial Naïve Bayes classifier whose features are the vectors of the unique words in the DAS texts (bag-of-words model);
- NB-TFIDF: Naïve Bayes classifier whose features are the vectors of the unique words in the DAS texts, weighted by their Term Frequency Inverse Document Frequency (TF-IDF) score [41];
- SVM: Support Vector Machines (SVM) classifier [42] whose features are the unique words in the DAS texts, weighted by their TF-IDF score;
- ET-Word2vec: Extra Trees classifier [43] whose features are the word embeddings in the DAS texts calculated using the word2vec algorithm [44];
- ET-Word2vec-TFIDF: Extra Trees classifier whose features are the word2vec word embeddings in the DAS texts weighted by TF-IDF.

TF-IDF is a weighting approach commonly used in information retrieval and has the effect of reducing the weight of words like *the, is, a*, which tend to occur in most documents. It is obtained by multiplying the term frequency (i.e. the number of times a term *t* appears in a document *d* divided by the total number of terms in *d*) by the inverse document frequency (i.e. the logarithm of the ratio between the total number of documents and the number of documents containing *t*).

We experimented with different parameter values, as detailed below:

- Stop words filter (values: ‘yes’ or ‘no’): whether or not we remove stop words from the texts before running the classifiers. Stop word lists include very common words (also known as function words) like prepositions (*in, at, etc.*), determiners (*the, a, etc.*), auxiliaries (*do, will, etc.*), and so on.
- Stemming (values: ‘yes’ or ‘no’): whether or not we reduce inflected (or sometimes derived) words to their word stem, base or root, for example stemming *fishing, fished, fisher* results in the stem *fish*.

The best combination of parameter values and classifier type was found to be an SVM with no use of stop words and with stemming, so this was chosen as the model for our subsequent analysis. Its accuracy is 98.7% on the test set, 100% only considering the 250 top DAS in the test set by frequency, and the frequency-weighted accuracy is also 100%. The average precision, recall, and F1-score weighted by support (i.e. the number of instances for each class) are 98.7%, 98.7%, and 98.6%, respectively. The classification report by category is shown in table 2. The retained classifier was finally used to classify all DAS in the dataset, keeping manual annotations where available.

**Table 2. Classification report by DAS category.**

| Category | Precision | Recall | F1-score | Support |
|----------|-----------|--------|----------|---------|
| 0        | 1.00      | 1.00   | 1.00     | 4       |
| 1        | 1.00      | 1.00   | 1.00     | 20      |
| 2        | 0.98      | 1.00   | 0.99     | 45      |
| 3        | 1.00      | 0.86   | 0.92     | 7       |

## Results

### The presence of data availability statements over time

Figure 2A and 2B show the number of articles in the dataset between the years 2000 and 2018 inclusive. The solid vertical lines show when the publisher introduced a DAS mandate (1 May 2015 for BMC, 1 March 2014 for PLOS [39]). BMC journals show a delayed uptake of this policy in published articles, presumably as it was introduced for *submitted* manuscripts rather than accepted manuscripts. The delay accounts for the time these papers would have been undergoing peer review and preparation for publication at the journals. PLOS journals, in comparison and despite PLOS announcing its policy would apply to submitted manuscripts also, appear to have put more effort into early enforcement and therefore have a slightly faster uptake, which may not be accounted for by average submission to publication times. Both publishers show clear adoption of DAS after their introduction of a mandate: in 2018 93.7% of 21,793 PLOS articles and 88.2% of 31,956 BMC articles had data availability statements.

**Fig 2. Data availability statements over time.** All the histograms above show the number of publications from specific subsets of the dataset and classify them into four categories: No DAS (0), Category 1 (data available on request), Category 2 (data contained within the article and supplementary materials), and Category 3 (a link to archived data in a public repository). The vertical solid line shows the date that the publisher introduced a mandated DAS policy. A dashed line indicates the date an encouraged policy was introduced. The  ups of articles are as follows. A: all BMC articles, B: all PLOS articles, C: all BMC Genomics articles, D: *PLOS One* articles, E: PLOS articles not published in *PLOS One*, F: articles from the *BMC Genomics* journal (selected to illustrate a journal that had high uptake of an encouraged policy), G: articles from the *Trials* journal (published by BMC, selected to illustrate a journal that has a very high percentage of data that can only be made available by request to the authors), H: articles from the *Parasites and Vectors* journal (selected to illustrate a journal that has an even distribution of the three DAS categories). Articles are binned by publication year.

Where the two publishers strongly differ are in the proportion of the different categories of data availability statements. Looking at the two most recent years in the

data set, 2017 and 2018, the largest category for BMC (60.0% of 54,719 articles with DAS) is category 1: “Data available on request or similar”. The remaining BMC articles were 19.2% (10,500 of 54,719) category 2 DAS and 12.2% (6,656 of 54,719) category 3 DAS. Over this same date range, the largest category for PLOS (65.2% of 43,388 articles) is category 2: “Data available with the paper and its supplementary files”. The remaining PLOS articles were 14.0% (6,065 of 43,388) category 1 DAS and 20.8% (9,013 of 43,388) category 3 DAS. The overrepresentation of categories 1 and 2 for BMC and PLOS articles respectively is likely due to the two publishers having different recommendations in their guidance for authors. For example, 37.3% (40,904 of 109,815) of all PLOS articles which contain a DAS have identical text: “All relevant data are within the paper and its Supporting Information files”. We note that although there are an order of magnitude more *PLOS ONE* articles than those published in all other PLOS journals (20,6824 compared to 34,336 in our data set) the pattern of DAS classes are very similar (Figure 2D and 2E). In comparison, the most common DAS (4.8%, 3,594 of 74,260) for BMC is “Not applicable”, followed by 3.5% (2,582 of 74,260) which have “The datasets used and/or analysed during the current study are available from the corresponding author on reasonable request.” These most common statements are, or have been, included as example statements in guidance to authors, suggesting authors often use these as templates, or copy them verbatim, in their manuscripts.

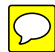

These statements remain the most common in the latest two years in the dataset (2017 and 2018) at 16.5% (PLOS) and 3.6% (BMC) although the proportions have decreased, hopefully indicating a more customised engagement with the data availability requirement by authors. BMC, in 2016, updated its data availability policy including the example DAS statements in its guidance for authors, in conjunction with other journals published by its parent publisher, Springer Nature.

BMC Series journals were encouraged to include a section on the “Availability of supporting data” [40] from July 2011. Although the majority of articles published between the encouraged and mandated dates did not have a DAS, 6.0% (1927 of 31,965) of the articles did include this information (Figure 2C). Of these articles with encouraged, rather than mandated, DAS, 65.9% of them (1,270 of 1,927) were category 3: “Data available in a repository”. Category 3 DAS are closest to “best practice” data management recommendations, and it is unsurprising that the authors who elected to complete this section when they were not required to do so have shared their data in the most usable manner. Taken together with the most common standard statements described above, we conclude that mandates are beneficial in increasing the number of data availability statements in published articles, but note that they do not guarantee ease of access or re-use.

There are differences in the proportion of DAS classes across academic domains. For example, *BMC Genomics* shows a strong representation of class 3 DAS during both the encouraged and required time periods (Figure 2F). In comparison, and unsurprisingly given the sensitive nature of the data presented in its articles, the journal *Trials* has a high proportion of class 1 DAS (Figure 2G). We select the journal *Parasites and Vectors* to illustrate that there are also research topics that have high variability of DAS classes within them (Figure 2H).

## Citation prediction

We focus next on predicting citation counts as a means to assess the potential influence of DAS in this respect.

**Dependent variable.** *Citation counts* for each article are calculated using the full PubMed OA dataset ( $N$  articles above). Citations are based on identifiers, hence only

references which include a valid ID are considered. Under these limits, we consider citations within a certain time-window from each article's publication (2, 3 and 5 years), calculated considering the month of publication, in order to allow for equal comparison over the same citation accrual time.

**Independent variables.** We use a set of *article-level variables*, commonly considered in similar studies [45–48]. We include the year of publication, to account for citation inflation over time; the month of publication (missing values are set to a default value of 6, that is June), to account for the known advantage of publications published early in the year; the number of authors and the total number of references (including those without a known ID), both usually correlated with citation impact.

The *reputation of authors* prior to the article publication has also been linked to the citation success of a paper [49]. In order to control for this, we had to identify individual authors, a challenging task in itself [50–54]. We focus on an article-level aggregated indicator of author popularity: the mean and median H-index of an article's authors at the time of publication. In so doing, we minimize the impact of errors arising from disambiguating author names [55,56], which would have been high if we had used measures based on individual observations such as the maximum H-index. We therefore used a simple disambiguation technique when compared to current state of the art, and considered two author mentions to refer to the same individual if both full name and surname (to lowercase) were found to be identical within all PubMed OA. The total number of authors we individuated with this approach is  $S = 4,253,172$ .

We further consider the following *journal-level variables*: if an article was published by a PLOS or BMC journal; if an article was published under encouraged or required DAS mandates; the domain/field/sub-field of the journal, as given by the Science-Metrix classification [57], in order to control for venue and research area.<sup>5</sup> We also control for the journal as a dummy variable in some models. An overview of the variables we use is given in Table 3, while a set of descriptive statistics for some of them are reported in Table 4.

The dataset we analyse and discuss below uses a window of three years for citation accrual, and includes publications until 2015 included, in order to allow for all articles to be compared on equal footing. Results using windows of two or five years are consistent. The number of publications under consideration here is thus  $M^{2015} = 367,836$ , of which  $M_q^{2015} = 45,968$  with a DAS. Correlation values among a set of variables are given in Table 5, calculated over this specific dataset.

**Model** The model we consider and discuss here is an Ordinary Least Squares (OLS) model based on the following formula:

$$\begin{aligned} \ln(n_{cit_3} + 1) = & \ln(n_{authors}) + \ln(n_{references\_tot} + 1) + p_{year} + p_{month} \\ & + \ln(h_{index\_mean} + 1) + h_{index\_median} + das\_category\_simple + is\_plos \\ & + das\_encouraged + das\_required + journal\_field + das\_category * is\_plos \end{aligned} \quad (1)$$

An OLS model for citation counts, after a log transform and the addition of 1, has been found to perform well in practice when compared to more involved alternatives [60,61]. We nevertheless use a variety of alternative models, which are

<sup>5</sup>Openly available here: <http://science-metrix.com/?q=en/classification>. Despite the fact that journal-level article classifications are not as accurate as citation clustering or other alternatives, the Science-Metrix classification has been recently found to be the best of its class and an overall reasonable choice [58,59].



**Table 3.** Summary of variables used in the regression models.

| Variable                   | Description                                                                               | Possible transformations      |
|----------------------------|-------------------------------------------------------------------------------------------|-------------------------------|
| <i>n_cit<sub>Y</sub></i>   | Number of citations received within a certain number of years <i>Y</i> after publication. | $\ln(n\_cit_Y + 1)$           |
| <b>Article-level</b>       |                                                                                           |                               |
| <i>n_authors</i>           | Number of authors.                                                                        | $\ln(n\_authors)$             |
| <i>n_references_tot</i>    | Total number of references.                                                               | $\ln(n\_references\_tot + 1)$ |
| <i>p_year</i>              | Publication year.                                                                         |                               |
| <i>p_month</i>             | Publication month.                                                                        |                               |
| <i>h_index_mean</i>        | Mean H-index of authors at publication time.                                              | $\ln(h\_index\_mean + 1)$     |
| <i>h_index_median</i>      | Median H-index of authors at publication time.                                            |                               |
| <i>das_category_simple</i> | DAS category (0 to 3. See Table 1).                                                       |                               |
| <b>Journal-level</b>       |                                                                                           |                               |
| <i>is_plos</i>             | If PLOS (1) or not (0).                                                                   |                               |
| <i>das_encouraged</i>      | If published under an encouraged DAS mandate (1) or not (0).                              |                               |
| <i>das_required</i>        | If published under a required DAS mandate (1) or not (0).                                 |                               |
| <i>journal_field</i>       | Dummy variable, from Science-Metrix.                                                      |                               |

**Table 4.** Descriptive statistics for (non-transformed) model variables over the whole dataset under analysis.

| Variable/Statistic       | Minimum                                                                             | Median | Mean  | Maximum |
|--------------------------|-------------------------------------------------------------------------------------|--------|-------|---------|
| <i>n_cit<sub>2</sub></i> | 0                                                                                   | 0      | 0.68  | 166     |
| <i>n_cit<sub>3</sub></i> | 0                                                                                   | 0      | 1.13  | 483     |
| <i>n_cit<sub>5</sub></i> | 0                                                                                   | 1      | 1.9   | 1732    |
| <i>n_cit_tot</i>         | 0                                                                                   | 1      | 2.84  | 2233    |
| <i>n_authors</i>         | 1                                                                                   | 6      | 6.68  | 2442    |
| <i>n_references_tot</i>  |  | 39     | 41.94 | 1097    |
| <i>p_year</i>            |  | 2014   | 2013  | 2018    |
| <i>p_month</i>           | 1                                                                                   | 7      | 5.43  | 12      |
| <i>h_index_median</i>    | 0                                                                                   | 1      | 1.17  | 28      |
| <i>h_index_mean</i>      | 0                                                                                   | 1.2    | 1.56  | 28      |

**Table 5.** Correlations among a set of variables. The values on the top-right half of the table over the diagonal are Spearman’s correlation coefficients, the values on the bottom-left half of the table over the diagonal are Pearson’s correlation coefficients. All variables are transformed as in the description of the model.

| Variable                      | $\ln(n\_cit_3 + 1)$ | $\ln(n\_authors)$ | <i>p_year</i> | <i>p_month</i> | $\ln(h\_index\_mean + 1)$ | <i>h_index_median</i>                                                                 | $\ln(n\_references\_tot + 1)$ |
|-------------------------------|---------------------|-------------------|---------------|----------------|---------------------------|---------------------------------------------------------------------------------------|-------------------------------|
| $\ln(n\_cit_3 + 1)$           |                     | 0.16              | 0.14          | -0.02          | 0.25                      | 0.2                                                                                   | 0.22                          |
| $\ln(n\_authors)$             | 0.16                |                   | 0.16          | -0.01          | 0.2                       | 0.06                                                                                  | 0.11                          |
| <i>p_year</i>                 | 0.14                | 0.16              |               | -0.02          | 0.39                      | 0.32                                                                                  | 0.1                           |
| <i>p_month</i>                | -0.01               | -0.01             | -0.03         |                | 0.01                      |  | 0.02                          |
| $\ln(h\_index\_mean + 1)$     | 0.25                | 0.18              | 0.41          | 0.02           |                           |  | 0.12                          |
| <i>h_index_median</i>         | 0.19                | 0                 | 0.28          | 0.02           | 0.82                      |                                                                                       | 0.08                          |
| $\ln(n\_references\_tot + 1)$ | 0.24                | 0.15              | 0.13          | 0.02           | 0.14                      | 0.07                                                                                  |                               |

made available in the accompanying repository and all corroborate our results [62].<sup>6</sup> We compare standard OLS and robust OLS here, noting how robust regression results do not differ significantly. The last interaction term between PLOS and the DAS classification is meant to single out the effect of DAS categories for the publishers. The results of fitted models are provided in Table 6.<sup>7</sup>

Regression results point out to a set of outcomes which are known in the literature, namely that articles with more authors and references tend to be slightly more highly cited. We also find a known citation inflation effect for more recent articles (reminding the reader that we consider an equal citation accumulation window of three years overall). Crucially, the mean author H-index is strongly correlated with higher citations, while not so much the median, indicating the preferential citation advantage given to more popular authors. We also find substantial effects at the journal field level, e.g. with General Science and Technology negatively impacting citations (we note that PLOS ONE falls entirely within this category). Articles from PLOS are also, overall, more cited than those from BMC.

Turning our attention to the effect of DAS on citation advantage, we note that the encouraged and required policies play a somewhat minor role. Nevertheless, all DAS categories positively impact citation counts, with category 3 standing out and contributing, when present, to an increase of 22.65% over the average citation rate of an article after three years from publication, which is 1.26 in this dataset under analysis. The increase is of 25.36% considering the 1.13 average citation rate of an article over the whole dataset instead. These positive contributions are less effective for PLOS articles, after controlling for the publisher. When we further control for individual venues (journal), DAS category 3 is the only one remaining significantly correlated with a positive citation impact (see repository). These results suggest that the citation advantage of DAS is not as much related to their mere presence, but to their contents. In particular, that DAS containing actual links to data stored in a repository are correlated to higher citation impact.

When interpreting these results it should be noted that we consider a relatively small sample of citations compared to the full citation counts of the papers under analysis. We, however, assume that the distribution of citations of the sample is representative of the real citation distribution. Based on this assumption, we conclude that there is an up to 25.36% relative gain in citation counts in general for a paper with DAS category 3. We discuss some possible motivations for this effect in our conclusions.

## Conclusions

In this contribution we consider Data Availability Statements (DAS): a section in research articles which is increasingly being encouraged or mandated by publishers and used by authors to state if and how their research data are made available. We use the PubMed Open Access collection and focus on journal articles published by BMC and PLOS, in order to address the following two questions: 1) are DAS being adopted as per publisher's policies and, if so, can we qualify DAS into categories determined by their contents? 2) Are different DAS categories correlated with an article's citation impact? In particular, are preferred DAS which include an explicit link to a repository, either via a URL or permanent identifier (category 3 in this study) more positively correlated with

<sup>6</sup>The models we test include ANOVA, tobit and GLM with negative binomial (on the full dataset and on the dataset of papers with 1 or more received citations), zero-inflated negative binomial, lognormal and Pareto 2 family distributions. We further test different models, including logistic regression on DAS category and on whether or not a paper is cited at least once.

<sup>7</sup>All the modelling has been performed in R [63] and RStudio [64], mostly relying on the DMwR [65], glamss [66], mass and nnet [67], vgam [68], ggplot2 [69], tidyverse [70] and stargazer [71] packages.



citation impact than alternatives? These questions are prompted by our intention to assess to what extent open science practices are adopted by publishers and authors, as well as to verify whether there is a benefit for authors who invest resources in order to (properly) make their research data available.

We find that DAS are rapidly adopted after the introduction of a mandate in the journals from both publishers. For reasons in large part related to what is proposed as a standard text for DAS, BMC publications mostly use category 1 (data available on request), while PLOS publications mostly use category 2 (data contained within the article and supplementary materials). Category 3 covers, for both publishers, just a fraction of DAS: 12.2% (BMC) and 20.8% (PLOS) respectively. This is in line with previous literature finding that only about 20% of *PLOS One* articles between March 2014 and May 2016 contain a link to a repository in their DAS [16]. We also note that individual journals show a significant degree of variation with respect to their DAS category distributions.

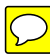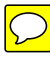

The results of citation prediction clearly point to a citation advantage, of up to 25.36%, for articles with a category 3 DAS – those including a link to a repository via a URL or other permanent identifier, consistent with the results of previous smaller, more focused studies [24–28]. This is encouraging, as it provides a further incentive to authors to make their data available using a repository. There might be a variety of reasons for this effect. More efforts and resources are put into papers sharing data, thus this choice might be made for better quality articles. It is also possible that more successful or visible research groups have also more resources at their disposal for sharing data as category 3. Sharing data likely also gives more credibility to an article’s results, as it supports reproducibility [72, 73]. Finally, data sharing encourages re-use, which might further contribute to citation counts.

Our study has a set of limitations. First of all, the willingness to operate fully reproducibly has constrained our choices with respect to data. While the PubMed OA collection is sizable, it includes just a minor fraction of all published literature. Even with respect to indicators based on citation counts (H-index, received citations), we decided not to use larger commercial options such as Web of Science or Scopus. We further focus on DAS given in dedicated sections, potentially missing those given in other parts of an article. Furthermore, we do not assess what a given repository contains in practice: this is *not* a replication study. Finally, citation counts are but one way to assess an article’s impact, among many. These and other limitations constitute potential avenues for future work: we believe that by sharing all our data and code, this study can be updated and built upon for the future analyses.

Future research that evaluates the contents and accuracy of DAS in a more detailed way than in this analysis, e.g., with more sophisticated and granular categorisation of DAS, would be valuable. For example, by comparing whether DAS that are highly templated from journals’ guidance for authors are associated with differences in citation counts compared to non-standard statements, and whether DAS are an accurate description of the location of data needed to reproduce the results reported in the article. We assume that non-templated statements imply more consideration of the journal’s data sharing policy by the authors, and potentially more rigorous approaches to research data management. However, we found non-templated statements to appear with a lower frequency than statements such as “All relevant data are within the paper and its Supporting Information files”.

There are several potential implications of our results. All stakeholders, from funding agencies to publishers and researchers, now have further evidence of an important benefit (increased citations) of providing access to research data. As a consequence, requests for strengthened and consistent research data policies, from research funders, publishers and institutions, can be better supported, enforced and

accepted. Introducing stronger research data policies carry associated costs for all stakeholders, which can be better justified with evidence of a citation benefit. Our finding that journal policies that encourage rather than require or mandate DAS have only a small effect on the volume of DAS published will be of interest to publishers, if their goal is to improve the availability of DAS. However, policies often serve to create cultural and behavioural change in a community and to signal the importance of an issue [74], and it is not uncommon for journals and publishers to introduce new editorial policies in a progressive manner, with policies, such as on availability of data and code, increasing in strength and rigour over time. Springer Nature, for example, have indicated they intend to support more of their journals with data sharing policies that do not mandate a DAS to mandate a DAS [3].

Our DAS classification approach, ~~and release of the data and code,~~ may be helpful for stakeholders interested in research data policy compliance, as it enables more automated approaches to the detection, extraction and classification of DAS across multiple journals and publishers, at least in the open access literature. Even wider adoption of DAS as a standard data policy requirement for publishers, funding agencies and institutions would further facilitate the visibility of links to data *as metadata*, enhancing data discoverability, credit allocation and positive research practices such as reproducibility. In fact, machine readable DAS would allow for the development of a research data index extending existing citation indexes and allowing, potentially, to monitor sharing behaviour by researchers and compliance with data policies of different stakeholders. DAS also provides a mechanism for more focused search and enrichment of the literature with links between research data/code, and scholarly articles. Links to research data provided within a DAS are most likely to refer to research data generated by or analysed in a study, potentially increasing the accuracy of services such as EU PubMed Central and Scholarly Link Exchange (Scholix), which can link scholarly publications to their supporting data.

## Data and code availability

Code and data can be found at: <https://doi.org/10.5281/zenodo.3268810> [75].

## Acknowledgments

This work was supported by The Alan Turing Institute under the EPSRC grant EP/N510129/1 and by Macmillan Education Ltd, part of Springer Nature, through grant RG92108 *Effect of data sharing policies on articles' citation counts*. The authors would like to thank Jo McEntyre and Audrey Hamelers at European Bioinformatics Institute / EUPMC for advice on using their APIs in the planning stage of this study. We also thank Angela Dappert at Springer Nature for support in obtaining journal metadata from Springer Nature. We finally thank James Hetherington, director of Research Engineering at The Alan Turing Institute, for supporting and advising GC through the project.

## Competing interests

At the time of conducting and writing the study IH was an employee of Springer Nature, publisher of the BMC journals. All other authors declare they have no competing interests.

## Regression table

**Table 6.** OLS and robust LS estimates for the citation prediction model under discussion.

|                                                          | Dependent variable:   |                       |
|----------------------------------------------------------|-----------------------|-----------------------|
|                                                          | $\ln(n\_cit_3 + 1)$   |                       |
|                                                          | OLS<br>(1)            | robust LS<br>(2)      |
| n_authors                                                | 0.103***<br>(0.002)   | 0.103***<br>(0.002)   |
| n_references_tot                                         | 0.197***<br>(0.002)   | 0.189***<br>(0.002)   |
| p_year                                                   | 0.011***<br>(0.0005)  | 0.011***<br>(0.0005)  |
| p_month                                                  | -0.011***<br>(0.0005) | -0.010***<br>(0.0004) |
| h_index_mean                                             | 0.218***<br>(0.004)   | 0.204***<br>(0.004)   |
| h_index_median                                           | 0.007***<br>(0.001)   | 0.008***<br>(0.001)   |
| C(das_category)1                                         | 0.085***<br>(0.024)   | 0.072***<br>(0.023)   |
| C(das_category)2                                         | 0.059***<br>(0.019)   | 0.057***<br>(0.018)   |
| C(das_category)3                                         | 0.252***<br>(0.012)   | 0.271***<br>(0.012)   |
| C(journal_field)Agriculture, Fisheries & Forestry        | -0.066***<br>(0.011)  | -0.051***<br>(0.011)  |
| C(journal_field)Biology                                  | -0.009<br>(0.009)     | 0.007<br>(0.009)      |
| C(journal_field)Biomedical Research                      | -0.027***<br>(0.005)  | -0.012**<br>(0.005)   |
| C(journal_field)Chemistry                                | -0.242***<br>(0.015)  | -0.214***<br>(0.014)  |
| C(journal_field)Clinical Medicine                        | -0.033***<br>(0.004)  | -0.021***<br>(0.004)  |
| C(journal_field)Enabling & Strategic Technologies        | 0.047***<br>(0.005)   | 0.054***<br>(0.005)   |
| C(journal_field)Engineering                              | -0.205***<br>(0.019)  | -0.177***<br>(0.019)  |
| C(journal_field)General Science & Technology             | -0.388***<br>(0.006)  | -0.370***<br>(0.006)  |
| C(journal_field)Information & Communication Technologies | 0.007<br>(0.013)      | 0.025*<br>(0.013)     |
| C(journal_field)Philosophy & Theology                    | -0.011                | 0.012                 |

|                                                 |                                |                       |
|-------------------------------------------------|--------------------------------|-----------------------|
|                                                 | (0.026)                        | (0.026)               |
| C(journal_field)Psychology & Cognitive Sciences | −0.160***<br>(0.021)           | −0.135***<br>(0.021)  |
| C(journal_field)Public Health & Health Services | 0.042***<br>(0.006)            | 0.057***<br>(0.006)   |
| das_requiredTrue                                | 0.073***<br>(0.005)            | 0.070***<br>(0.004)   |
| das_encouragedTrue                              | −0.052***<br>(0.004)           | −0.048***<br>(0.004)  |
| is_plosTrue                                     | 0.211***<br>(0.004)            | 0.213***<br>(0.004)   |
| C(das_category)1:is_plosTrue                    | −0.077***<br>(0.025)           | −0.066***<br>(0.025)  |
| C(das_category)2:is_plosTrue                    | −0.040**<br>(0.019)            | −0.038**<br>(0.019)   |
| C(das_category)3:is_plosTrue                    | −0.163***<br>(0.014)           | −0.192***<br>(0.014)  |
| Constant                                        | −22.228***<br>(0.967)          | −23.297***<br>(0.950) |
| Observations                                    | 367,836                        | 367,836               |
| R <sup>2</sup>                                  | 0.144                          |                       |
| Adjusted R <sup>2</sup>                         | 0.144                          |                       |
| Residual Std. Error (df = 367808)               | 0.593                          | 0.665                 |
| F Statistic                                     | 2,285.393*** (df = 27; 367808) |                       |

Note: \* $p < 0.1$ ; \*\* $p < 0.05$ ; \*\*\* $p < 0.01$

## References

1. Hodson S, Molloy L. Current Best Practice for Research Data Management Policies. 2015;doi:10.5281/zenodo.27872.
2. New policy for structural data. *Nature*. 1998;394(6689). doi:10.1038/27971.
3. Jones L, Grant R, Hrynaszkiewicz I. Implementing publisher policies that inform, support and encourage authors to share data: two case studies. *Insights the UKSG journal*. 2019;32. doi:10.1629/uksg.463.
4. Hrynaszkiewicz I, Birukou A, Astell M, Swaminathan S, Kenall A, Khodiyar V. Standardising and harmonising research data policy in scholarly publishing. *IJDC*. 2017;12(1). doi:10.2218/ijdc.v12i1.531.
5. Announcement: Where are the data? *Nature*. 2016;537(7619). doi:10.1038/537138a.
6. Murphy F, Samors RJ. Belmont Forum Data Accessibility Statement Policy and Template - Endorsed 18 October 2018. 2018;doi:10.5281/zenodo.1476871.
7. Schmidt B, Gemeinholzer B, Treloar A. Open data in global environmental research: The Belmont forum's open data survey. *PLoS ONE*. 2016;11(1):e0146695. doi:10.1371/journal.pone.0146695.

8. Giofrè D, Cumming G, Fresc L, Boedker I, Tressoldi P. The influence of journal submission guidelines on authors' reporting of statistics and use of open research practices. *PLoS ONE*. 2017;12(4):e0175583. doi:10.1371/journal.pone.0175583.
9. Vines TH, Andrew RL, Bock DG, Franklin MT, Gilbert KJ, Kane NC, et al. Mandated data archiving greatly improves access to research data. *FASEB J*. 2013;27(4):1304–1308. doi:10.1096/fj.12-218164.
10. Science D, Hahnel M, Fane B, Treadway J, Baynes G, Wilkinson R, et al. The State of Open Data Report. 2018;.
11. Wicherts JM, Borsboom D, Kats J, Molenaar D. The poor availability of psychological research data for reanalysis. *Am Psychol*. 2006;61(7):726–728. doi:10.1037/0003-066X.61.7.726.
12. Rowhani-Farid A, Barnett AG. Has open data arrived at the British Medical Journal (BMJ)? An observational stud. *BMJ Open*. 2016;6(10):e011784. doi:10.1136/bmjopen-2016-011784.
13. Vasilevsky NA, Minnier J, Haendel MA, Champieux RE. Reproducible and reusable research: are journal data sharing policies meeting the mark? *PeerJ*. 2017;5:e3208. doi:10.7717/peerj.3208.
14. Naudet F, Sakarovitch C, Janiaud P, Cristea I, Fanelli D, Moher D, et al. Data sharing and reanalysis of randomized controlled trials in leading biomedical journals with a full data sharing policy: survey of studies published in *The BMJ* and *PLOS Medicine*. *BMJ*. 2018;360:k400. doi:10.1136/bmj.k400.
15. Hardwicke TE, Mathur MB, MacDonald KE, Nilsson G, Banks GC, Kidwell M, et al. Data availability, reusability, and analytic reproducibility: Evaluating the impact of a mandatory open data policy at the journal *Cognition*. 2018;doi:10.31222/osf.io/39cfb.
16. Federer LM, Belter CW, Joubert DJ, Livinski A, Lu YL, Snyders LN, et al. Data sharing in *PLOS ONE*: An analysis of Data Availability Statements. *PLOS ONE*. 2018;13(5):e0194768. doi:10.1371/journal.pone.0194768.
17. McDonald L, Schultze A, Simpson A, Graham S, Wasiak R, Ramagopalan SV. A review of data sharing statements in observational studies published in the *BMJ*: A cross-sectional study. *F1000Research*. 2017;6:1708. doi:10.12688/f1000research.12673.2.
18. Naudet F, Sakarovitch C, Janiaud P, Cristea I, Fanelli D, Moher D, et al. Data sharing and reanalysis of randomized controlled trials in leading biomedical journals with a full data sharing policy: survey of studies published in *The BMJ* and *PLOS Medicine*. *BMJ*. 2018; p. k400. doi:10.1136/bmj.k400.
19. Park H, Wolfram D. Research software citation in the Data Citation Index: Current practices and implications for research software sharing and reuse. *Journal of Informetrics*. 2019;13(2):574–582. doi:10.1016/j.joi.2019.03.005.
20. Longo DL, Drazen JM. Data Sharing. *New England Journal of Medicine*. 2016;374(3):276–277. doi:10.1056/NEJMe1516564.
21. Milham MP, Craddock RC, Son JJ, Fleischmann M, Clucas J, Xu H, et al. Assessment of the impact of shared brain imaging data on the scientific literature. *Nature Communications*. 2018;9(1). doi:10.1038/s41467-018-04976-1.

22. Popkin G. Data sharing and how it can benefit your scientific career. *Nature*. 2019;569(7756):445–447. doi:10.1038/d41586-019-01506-x.
23. Wallach JD, Boyack KW, Ioannidis JPA. Reproducible research practices, transparency, and open access data in the biomedical literature, 2015–2017. *PLOS Biology*. 2018;16(11):e2006930.
24. Piwowar HA, Day RS, Fridsma DB. Sharing detailed research data is associated with increased citation rate. *PLoS ONE*. 2007;2(3):e308. doi:10.1371/journal.pone.0000308.
25. Piwowar HA, Vision TJ. Data reuse and the open data citation advantage. *PeerJ*. 2013;1:e175. doi:10.7717/peerj.175.
26. Sears JR. Data Sharing Effect on Article Citation Rate in Paleoceanography. *AGU Fall Meeting Abstracts*. 2011; p. IN53B–1628.
27. Henneken EA, Accomazzi A. Linking to Data: Effect on Citation Rates in Astronomy. In: Ballester P, Egret D, Lorente NPF, editors. *Astronomical Data Analysis Software and Systems XXI*. vol. 461 of *Astronomical Society of the Pacific Conference Series*; 2012. Available from: <http://arxiv.org/abs/1111.3618>.
28. Dorch BF, Drachen TM, Ellegaard O. The data sharing advantage in astrophysics. *IAU*. 2015;11(A29A):172–175. doi:10.1017/S1743921316002696.
29. Grant R, Hrynaskiewicz I. The impact on authors and editors of introducing Data Availability Statements at Nature journals. *International Journal of Digital Curation*. 2018;13(1):195–203. doi:10.2218/ijdc.v13i1.614.
30. Python Core Team. Python: A dynamic, open source programming language; 2001–. Available from: <https://www.python.org>.
31. Jones E, Oliphant T, Peterson P, et al.. SciPy: Open source scientific tools for Python; 2001–. Available from: <http://www.scipy.org>.
32. Pedregosa F, Varoquaux G, Gramfort A, Michel V, Thirion B, Grisel O, et al. Scikit-learn: Machine Learning in Python. *Journal of Machine Learning Research*. 2011;12:2825–2830.
33. McKinney W. Data Structures for Statistical Computing in Python. *Proceedings of the 9th Python in Science Conference*. 2010; p. 51–56.
34. Stéfan van der Walt CC, Varoquaux G. The NumPy Array: A Structure for Efficient Numerical Computation. *Computing in Science & Engineering*. 2011;13:22–30. doi:10.1109/MCSE.2011.37.
35. Bird S, Loper E, Klein E. *Natural Language Processing with Python*; 2009.
36. Hunter JD. Matplotlib: A 2D Graphics Environment. *Computing in Science & Engineering*. 2007;9:90–95. doi:10.1109/MCSE.2007.55.
37. Waskom M, et al.. mwaskom/seaborn: v0.8.1 (September 2017); 2017. Available from: <https://doi.org/10.5281/zenodo.883859>.
38. Řehůřek R, Sojka P. Software Framework for Topic Modelling with Large Corpora. In: *Proceedings of the LREC 2010 Workshop on New Challenges for NLP Frameworks*. Valletta, Malta: ELRA; 2010. p. 45–50.

39. Bloom T, Ganley E, Winker M. Data Access for the Open Access Literature: PLOS's Data Policy. *PLoS Biology*. 2014;12(2):e1001797. doi:10.1371/journal.pbio.1001797.
40. Hrynaszkiewicz I. Availability of supporting data: crediting transparency and enhancing the literature; 2011. Available from: <https://blogs.biomedcentral.com/bmcblog/2011/07/07/availability-of-supporting-data-crediting-transparency-and-enhancing-the->
41. Manning CD, Raghavan P, Schütze H. *Introduction to Information Retrieval*. Cambridge: Cambridge University Press; 2008.
42. Joachims T. Text Categorization with Support Vector Machines: Learning with Many Relevant Features. In: *Proceedings of the 10th European Conference on Machine Learning. ECML'98*. Berlin, Heidelberg: Springer-Verlag; 1998. p. 137–142.
43. Wang A, Wan G, Cheng Z, Li S. An Incremental Extremely Random Forest Classifier for Online Learning and Tracking. In: *Proceedings of the 16th IEEE International Conference on Image Processing. ICIP'09*. Piscataway, NJ, USA: IEEE Press; 2009. p. 1433–1436.
44. Mikolov T, Chen K, Corrado G, Dean J. Efficient Estimation of Word Representations in Vector Space. In: *1st International Conference on Learning Representations, ICLR 2013, Scottsdale, Arizona, USA, May 2-4, 2013, Workshop Track Proceedings; 2013*. Available from: <http://arxiv.org/abs/1301.3781>.
45. Gargouri Y, Hajjem C, Larivière V, Gingras Y, Carr L, Brody T, et al. Self-Selected or Mandated, Open Access Increases Citation Impact for Higher Quality Research. *PLoS ONE*. 2010;5(10):e13636. doi:10.1371/journal.pone.0013636.
46. Yegros-Yegros A, Rafols I, D'Este P. Does Interdisciplinary Research Lead to Higher Citation Impact? The Different Effect of Proximal and Distal Interdisciplinarity. *PLoS ONE*. 2015;10(8):e0135095. doi:10.1371/journal.pone.0135095.
47. Wang J, Veugelers R, Stephan P. Bias against novelty in science: A cautionary tale for users of bibliometric indicators. *Research Policy*. 2017;46(8):1416–1436. doi:10.1016/j.respol.2017.06.006.
48. Struck B, Durning M, Roberge G, Campbell D. Modelling the Effects of Open Access, Gender and Collaboration on Citation Outcomes: Replicating, Expanding and Drilling. In: *STI 2018 Conference Proceedings*. Leiden, The Netherlands: Centre for Science and Technology Studies (CWTS); 2018. p. 436–447. Available from: <http://hdl.handle.net/1887/65337>.
49. Sekara V, Deville P, Ahnert SE, Barabási AL, Sinatra R, Lehmann S. The chaperone effect in scientific publishing. *Proceedings of the National Academy of Sciences*. 2018;115(50):12603–12607. doi:10.1073/pnas.1800471115.
50. Torvik VI, Smalheiser NR. Author name disambiguation in MEDLINE. *ACM Transactions on Knowledge Discovery from Data*. 2009;3(3):1–29. doi:10.1145/1552303.1552304.
51. Lu Z. PubMed and beyond: a survey of web tools for searching biomedical literature. *Database*. 2011;2011:baq036–baq036. doi:10.1093/database/baq036.



52. Ferreira AA, Gonçalves MA, Laender AHF. A brief survey of automatic methods for author name disambiguation. *ACM SIGMOD Record*. 2012;41(2):15. doi:10.1145/2350036.2350040.
53. Liu W, Islamaj Doğan R, Kim S, Comeau DC, Kim W, Yeganova L, et al. Author Name Disambiguation for PubMed. *Journal of the Association for Information Science and Technology*. 2014;65(4):765–781. doi:10.1002/asi.23063.
54. Zheng JG, Howsmon D, Zhang B, Hahn J, McGuinness D, Hendler J, et al. Entity linking for biomedical literature. *BMC Medical Informatics and Decision Making*. 2015;15(S1). doi:10.1186/1472-6947-15-S1-S4.
55. Strotmann A, Zhao D. Author name disambiguation: What difference does it make in author-based citation analysis? *Journal of the American Society for Information Science and Technology*. 2012;63(9):1820–1833. doi:10.1002/asi.22695.
56. Kim J, Diesner J. Distortive effects of initial-based name disambiguation on measurements of large-scale coauthorship networks. *Journal of the Association for Information Science and Technology*. 2016;67(6):1446–1461. doi:10.1002/asi.23489.
57. Archambault E, Beauchesne OH, Caruso J. Towards a multilingual, comprehensive and open scientific journal ontology. In: *Proceedings of the 13th International Conference of the International Society for Scientometrics and Informetrics*; 2011. p. 66–77.
58. Klavans R, Boyack KW. Which Type of Citation Analysis Generates the Most Accurate Taxonomy of Scientific and Technical Knowledge? *Journal of the Association for Information Science and Technology*. 2017;68(4):984–998. doi:10.1002/asi.23734.
59. Boyack KW. Investigating the effect of global data on topic detection. *Scientometrics*. 2017;111(2):999–1015. doi:10.1007/s11192-017-2297-y.
60. Thelwall M, Wilson P. Regression for citation data: An evaluation of different methods. *Journal of Informetrics*. 2014;8(4):963–971. doi:10.1016/j.joi.2014.09.011.
61. Thelwall M. The discretised lognormal and hooked power law distributions for complete citation data: Best options for modelling and regression. *Journal of Informetrics*. 2016;10(2):336–346. doi:10.1016/j.joi.2015.12.007.
62. Ajiferuke I, Famoye F. Modelling count response variables in informetric studies: Comparison among count, linear, and lognormal regression models. *Journal of Informetrics*. 2015;9(3):499–513. doi:10.1016/j.joi.2015.05.001.
63. R Core Team. *R: A Language and Environment for Statistical Computing*; 2018. Available from: <https://www.R-project.org>.
64. RStudio Team. *RStudio: Integrated Development Environment for R*; 2015. Available from: <http://www.rstudio.com/>.
65. Torgo L. *Data Mining with R, learning with case studies*. London: Chapman and Hall/CRC; 2010.
66. Rigby RA, Stasinopoulos DM. Generalized additive models for location, scale and shape,(with discussion). *Applied Statistics*. 2005;54:507–554.



67. Venables WN, Ripley BD. *Modern Applied Statistics with S*. 4th ed. New York: Springer; 2002.
68. Yee TW. The VGAM Package for Categorical Data Analysis. *Journal of Statistical Software*. 2010;32:1–34.
69. Wickham H. *ggplot2: Elegant Graphics for Data Analysis*. New York: Springer-Verlag; 2009.
70. Wickham H, Grolemund G. *R for data science: import, tidy, transform, visualize, and model data*. Sebastopol, CA: O’Reilly; 2016.
71. Hlavac M. *stargazer: Well-Formatted Regression and Summary Statistics Tables*; 2018. R package version 5.2.2.  
<https://CRAN.R-project.org/package=stargazer>.
72. Ioannidis JPA, Allison DB, Ball CA, Coulibaly I, Cui X, Cullhane AC, et al. Repeatability of published microarray gene expression analyses. *Nature Genetics*. 2009;41(2):149–155. doi:10.1038/ng.295.
73. Markowitz F. Five selfish reasons to work reproducibly. *Genome Biology*. 2015;16(1). doi:10.1186/s13059-015-0850-7.
74. Neylon C. Building a Culture of Data Sharing: Policy Design and Implementation for Research Data Management in Development Research. *Research Ideas and Outcomes*. 2017;3:e21773. doi:10.3897/rio.3.e21773.
75. Colavizza G, Hrynaszkiewicz I, Staden I, Whitaker K, McGillivray B. The citation advantage of linking publications to research data (Version v1.1); 2019. Zenodo. <http://doi.org/10.5281/zenodo.3268810>.

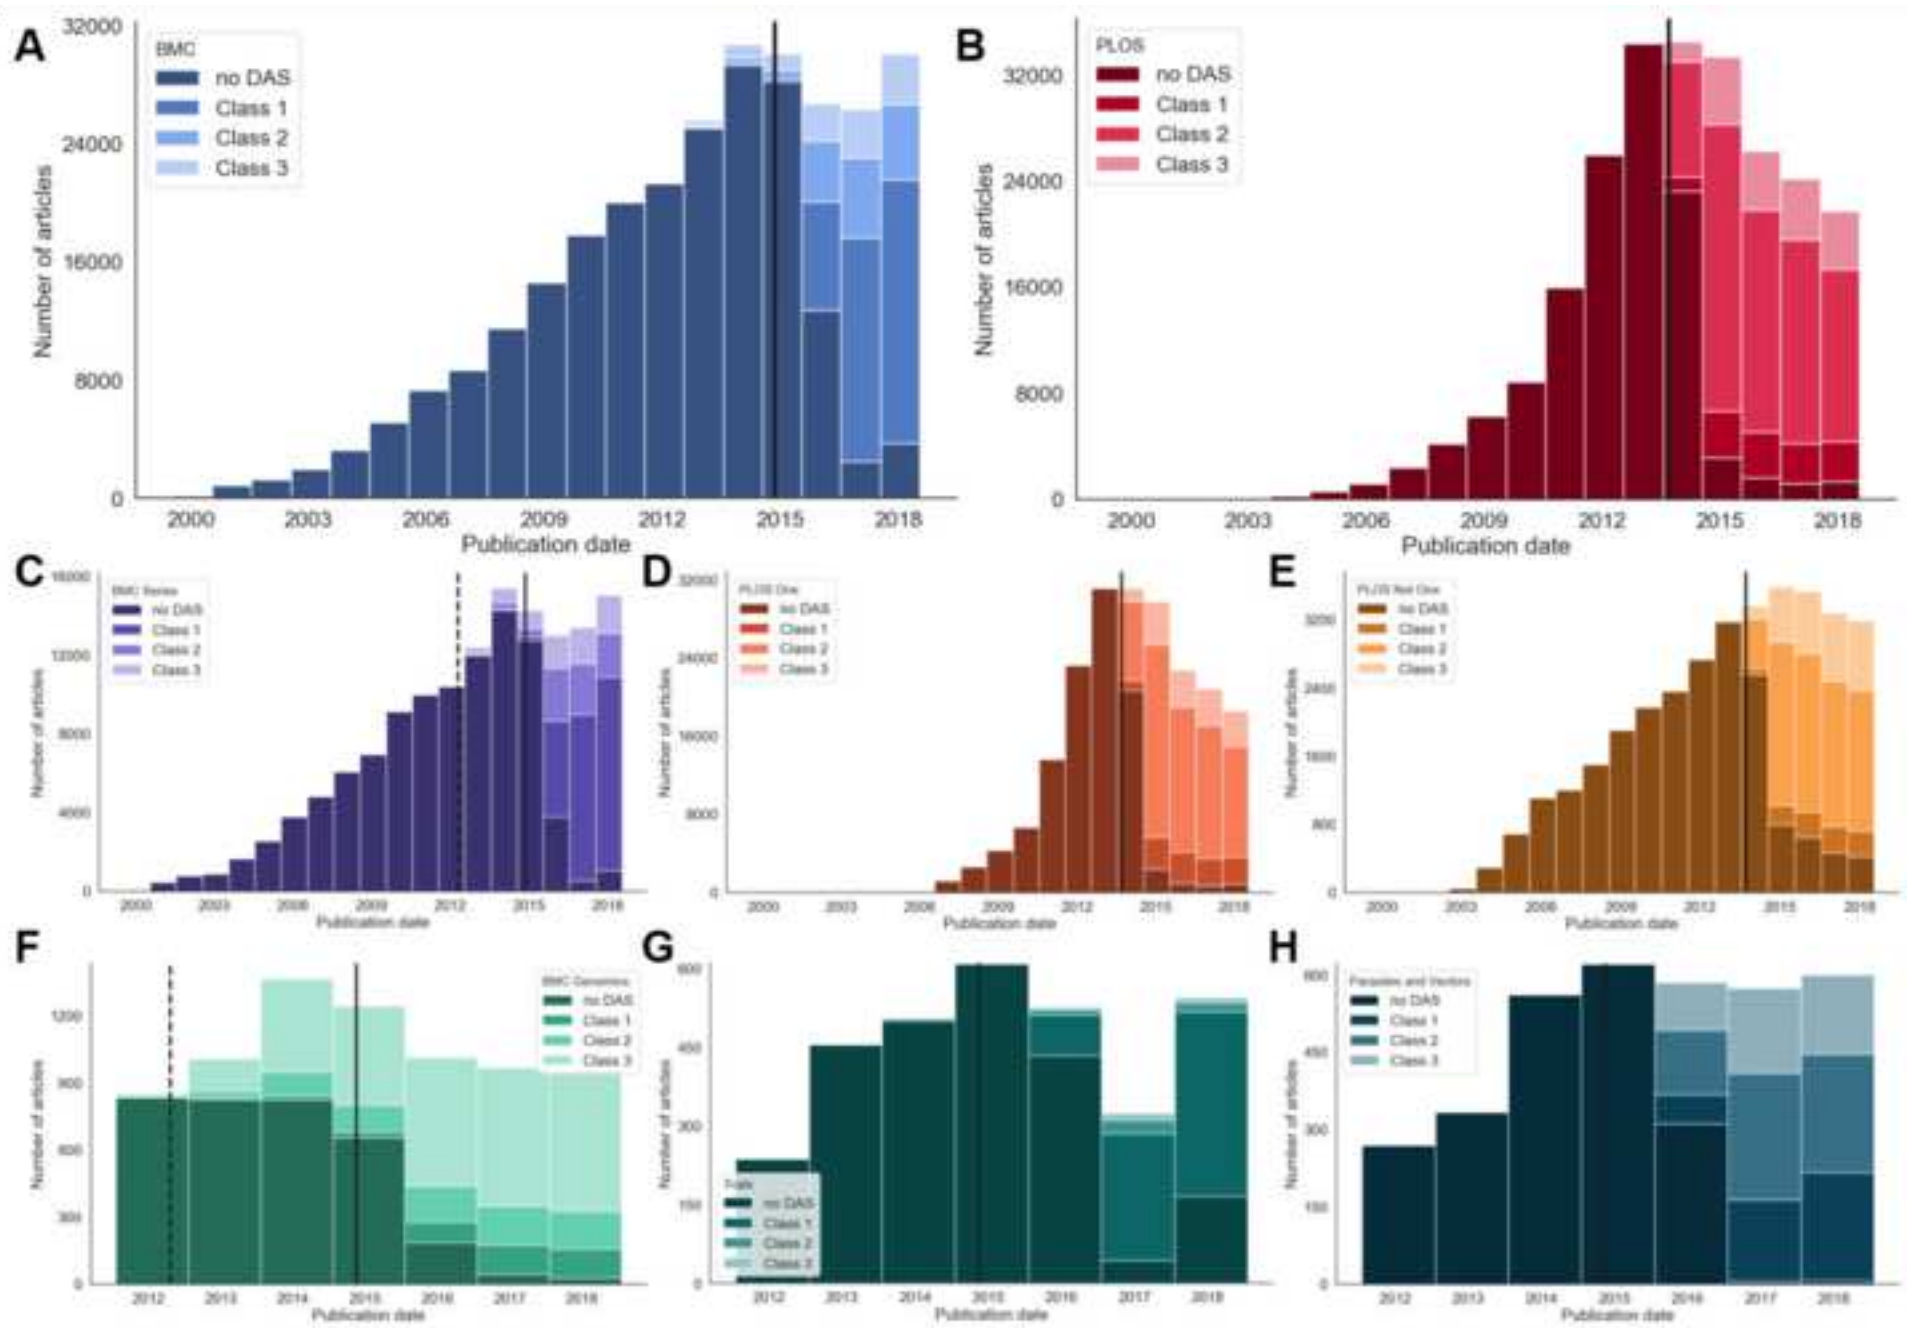

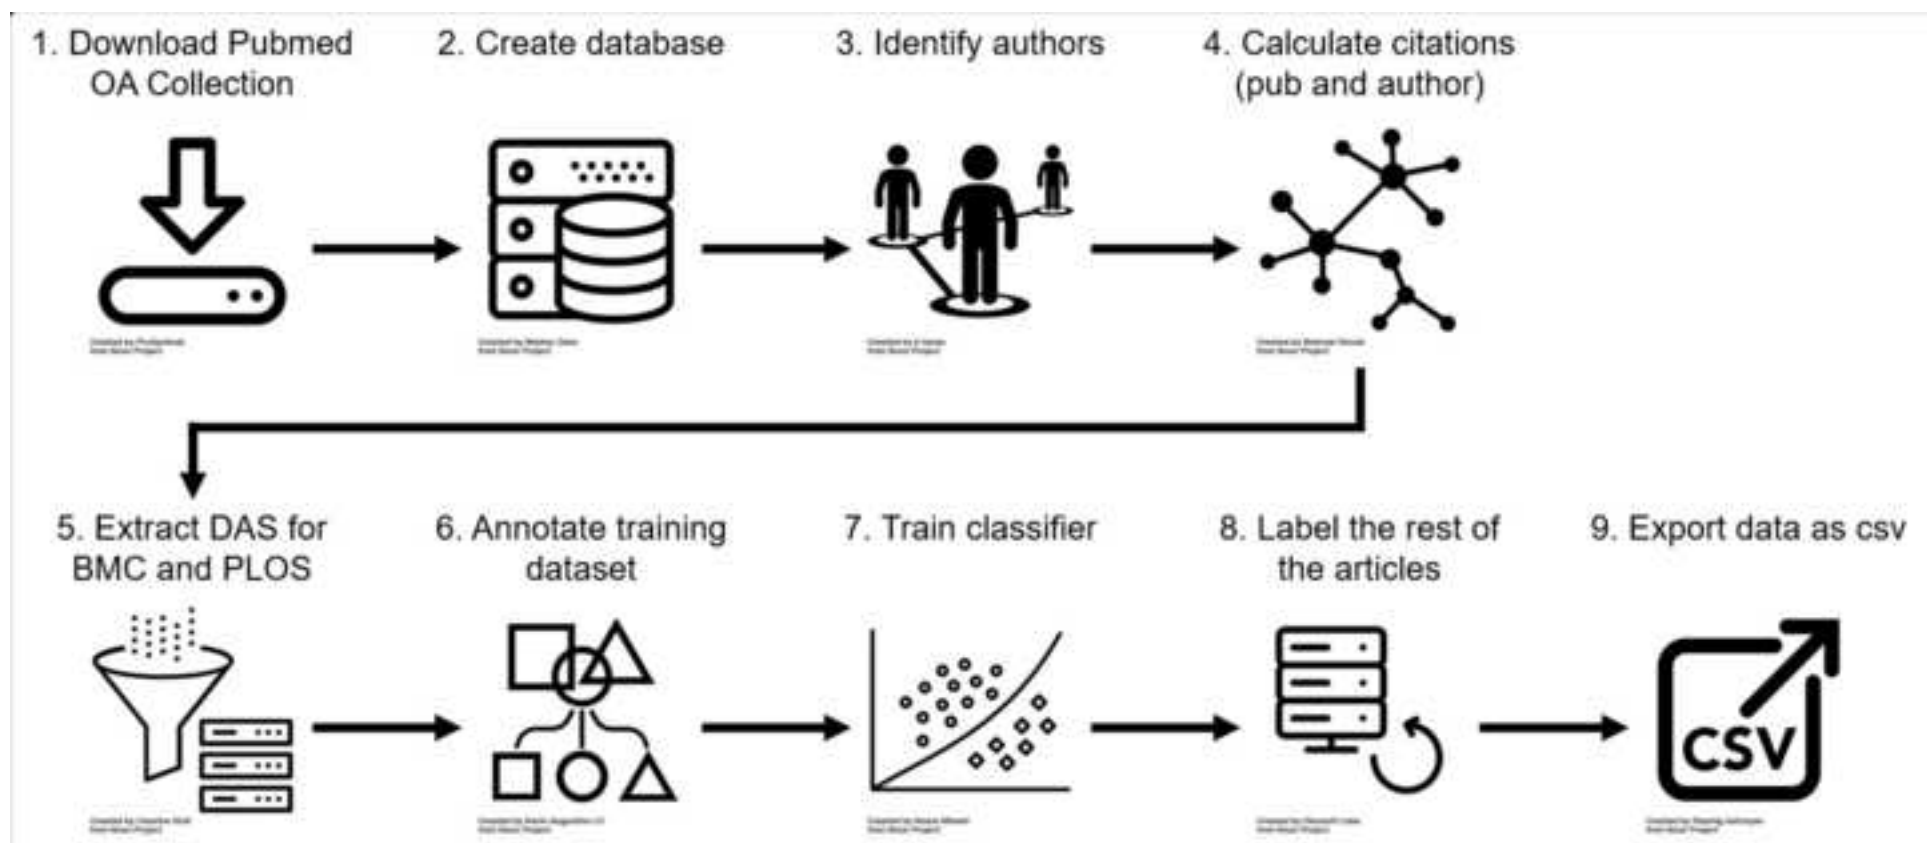

Supplement: pone.0230416.s001.pdf [file pone.0230416.s001.pdf]
